# Supplementary material
Source: Frontiers journal article supplement (https://www.frontiersin.org/articles/282288)
Supplement: Image_7.PDF [file Image_7.PDF]

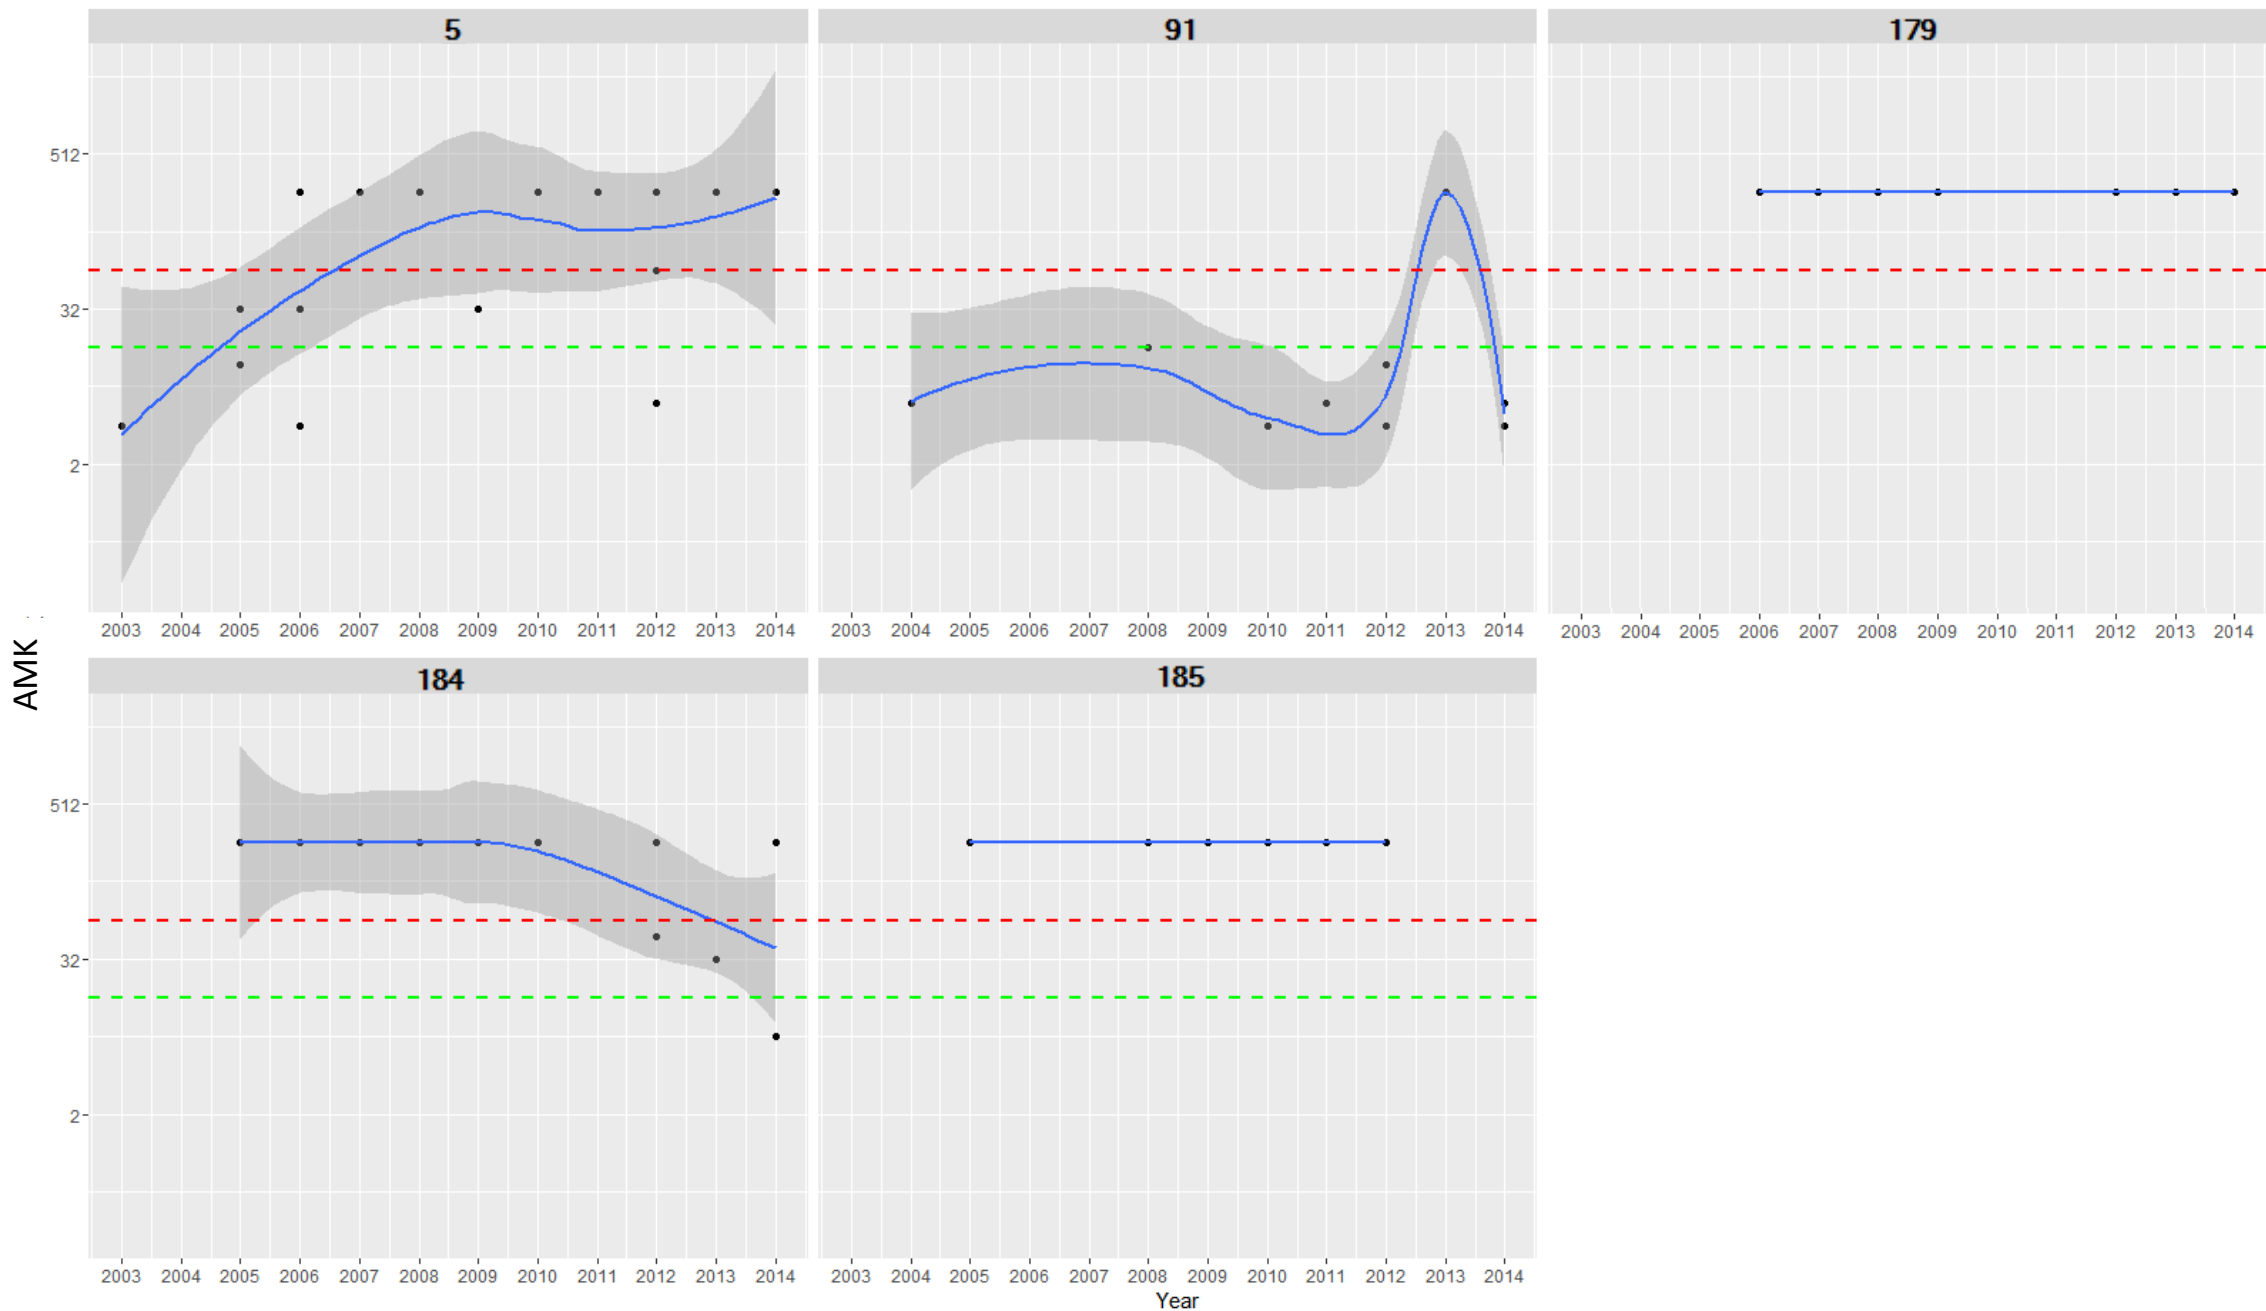

**Supplementary Figure 7a.** Temporal trend of Amikacin MIC values in selected STs. Dotted lines indicate breakpoint-MIC for resistance (red) and susceptibility (green), according to CLSI-guidelines.

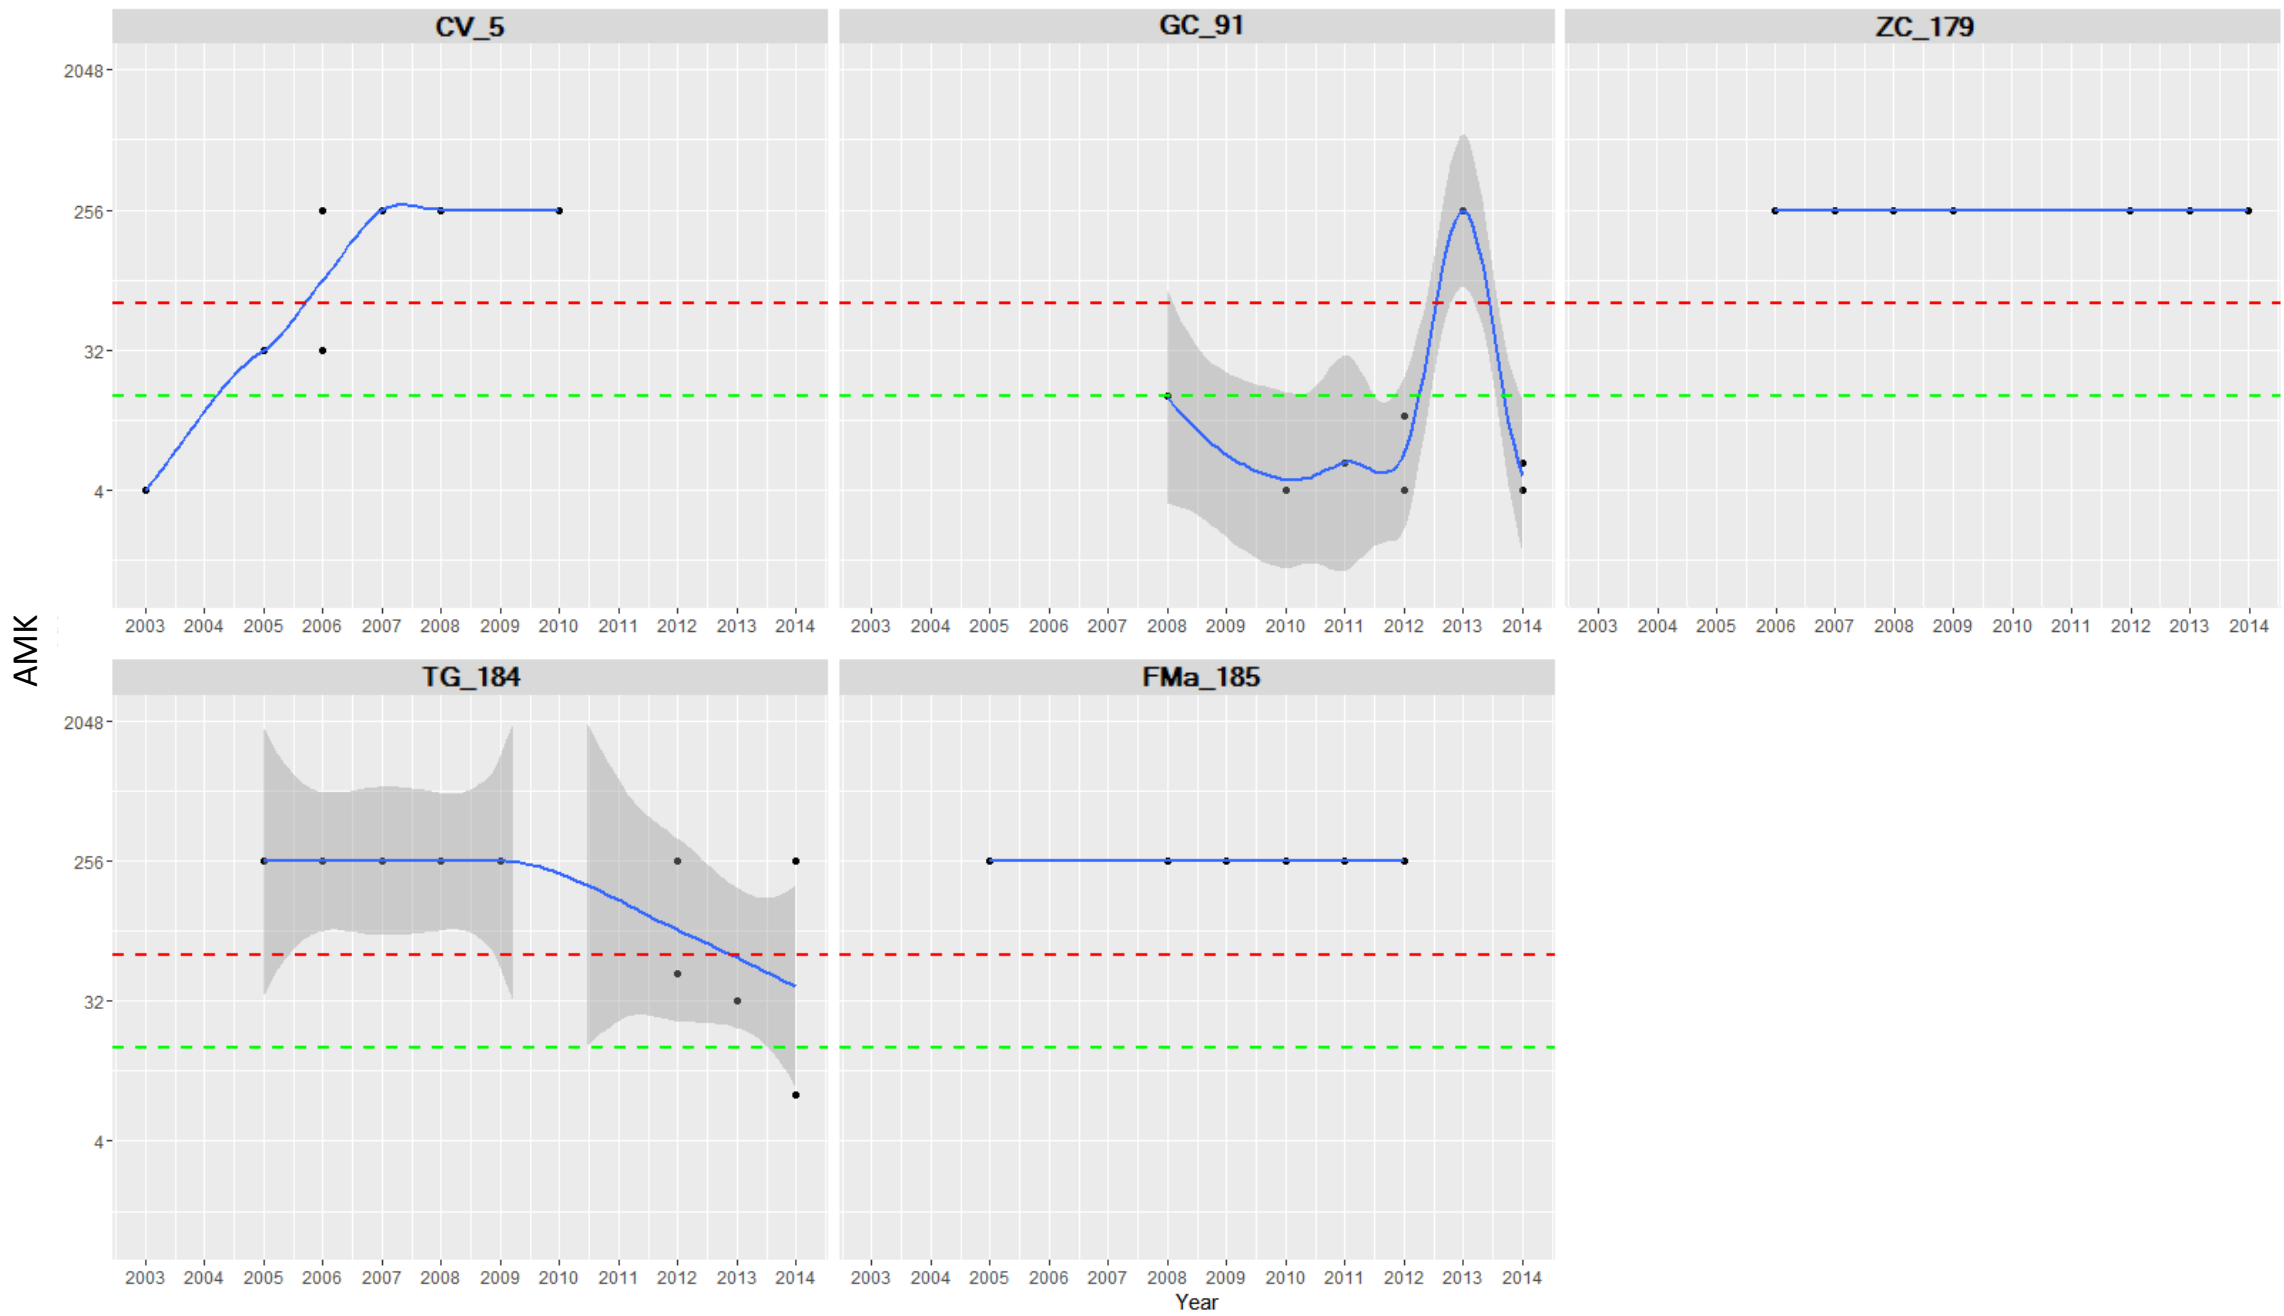

**Supplementary Figure 7b.** Temporal trend of Amikacin MIC values in selected «ST-patient» combinations. Dotted lines indicate breakpoint-MIC for resistance (red) and susceptibility (green), according to CLSI-guidelines.
